# Supplementary material for: Mitochondrial dynamics underlying thermal plasticity of cuttlefish (Sepia officinalis) hearts
Source: Oxford University Press journal article supplement (doi:10.1242/jeb.068163), 2012-01-01
Supplement: jeb068163tabless1-s2.pdf [file jeb068163tabless1-s2.pdf]

Table S1. Action and concentrations of the agents used to assay mitochondrial respiration of permeabilised heart fibres from the European cuttlefish

| Agent               | Action                                                                                                     | Final concentration       |
|---------------------|------------------------------------------------------------------------------------------------------------|---------------------------|
| Substrates          |                                                                                                            |                           |
| Proline             | Amino acid substrate                                                                                       | 5 mmol l <sup>-1</sup>    |
| Pyruvate            | Carbohydrate substrate                                                                                     | 5 mmol l <sup>-1</sup>    |
| Succinate           | Carbohydrate substrate                                                                                     | 10 mmol l <sup>-1</sup>   |
| ADP                 | Substrate for ATP generation                                                                               | 2.5 mmol l <sup>-1</sup>  |
| Cytochrome <i>c</i> | Electron carrier, tests for outer membrane integrity                                                       | 0.01 mmol l <sup>-1</sup> |
| TMPD                | Complex IV substrate                                                                                       | 5 mmol l <sup>-1</sup>    |
| Ascorbate           | Complex IV substrate                                                                                       | 20 mmol l <sup>-1</sup>   |
| Inhibitors          |                                                                                                            |                           |
| Antimycin           | Inhibits complex III, to test non-mitochondrial respiration                                                | 2.5 µmol l <sup>-1</sup>  |
| Rotenone            | Complex I inhibitor                                                                                        | 2.5 µmol l <sup>-1</sup>  |
| Oligomycin          | Inhibits ATP synthase, to test proton leak                                                                 | 2 µg ml <sup>-1</sup>     |
| Uncoupler           |                                                                                                            |                           |
| FCCP                | Uncouples the electron transport system electron flow from ATP generation by relieving the proton gradient | 2.5 µmol l <sup>-1</sup>  |

Table S2. Measurements of the European cuttlefish *Sepia officinalis* used in acclimation experiments

| Identifier | Origin        | Acclimation temperature (°C) | Sex    | Date of sampling | Total mass (g) | Mantle length (cm) | Systemic heart mass (mg) | Branchial heart #1 mass (mg) | Branchial heart #2 mass (mg) | Comments                                                                               |
|------------|---------------|------------------------------|--------|------------------|----------------|--------------------|--------------------------|------------------------------|------------------------------|----------------------------------------------------------------------------------------|
| A06        | Adriatic      | 11                           | Male   | 7/07/2009        | 90.22          | 8.8                | 58.3                     | 38.5                         | 33.5                         |                                                                                        |
| A10        | Adriatic      | 11                           | Male   | 14/07/2009       | 63.34          | 8.0                | 39.3                     | 25.4                         | 28.9                         |                                                                                        |
| A13        | Adriatic      | 11                           | Male   | 16/07/2009       | 83.75          | 8.5                | 49.3                     | 37.0                         | 34.3                         | Animal was inking during capture                                                       |
| A30        | Adriatic      | 11                           | Female | 21/09/2009       | 99.20          | 9.1                | 58.6                     | 38.0                         | 37.4                         | Animal was inking during capture                                                       |
| A63        | Adriatic      | 11                           | Female | 14/07/2010       | 110.53         | 9.3                | 58.3                     | 39.7                         | 39.2                         | Animal was inking during capture                                                       |
| A64        | Adriatic      | 11                           | Male   | 19/07/2010       | 78.47          | 8.2                | 40.1                     | 27.8                         | 30.9                         | Animal was inking during capture                                                       |
| A65        | Adriatic      | 11                           | Female | 20/07/2010       | 86.40          | 8.0                | 43.1                     | 34.9                         | 35.3                         | Animal was slightly inking during capture                                              |
| A69*       | Adriatic      | 11                           | Male   | 22/11/2010       | 48.20          | –                  | 24.6                     | 19.9                         | 18.4                         |                                                                                        |
| A07        | Adriatic      | 16                           | Female | 8/07/2009        | 46.90          | 6.8                | 30.5                     | 23.7                         | 22.4                         |                                                                                        |
| A09        | Adriatic      | 16                           | Male   | 13/07/2009       | 40.57          | 7.0                | 27.0                     | 11.6                         | 19.5                         | Animal was inking during capture                                                       |
| A14        | Adriatic      | 16                           | Male   | 20/07/2009       | 72.52          | 8.2                | 44.9                     | 24.7                         | 27.5                         | Animal was inking during capture                                                       |
| A19        | Adriatic      | 16                           | Female | 30/07/2009       | 77.88          | 7.9                | 46.4                     | 42.2                         | 38.5                         | Animal was inking during capture, very well developed gonads                           |
| A24        | Adriatic      | 16                           | Female | 10/08/2009       | 59.11          | 7.4                | 37.1                     | 41.6                         | 42.6                         |                                                                                        |
| A46*       | Adriatic      | 16                           | Female | 20/04/2010       | 50.10          | 7.1                | 27.3                     | 18.3                         | 18.7                         | Animal was inking during capture                                                       |
| A47*       | Adriatic      | 16                           | Male   | 21/04/2010       | 49.87          | 7.0                | 27.1                     | 15.0                         | 16.5                         | Animal was inking during capture                                                       |
| A48*       | Adriatic      | 16                           | Male   | 26/04/2010       | 59.67          | 7.5                | 33.7                     | 24.5                         | 21.8                         | Animal was inking during capture                                                       |
| A49*       | Adriatic      | 16                           | Female | 27/04/2010       | 62.66          | 7.2                | 33.0                     | 20.9                         | 24.7                         | Animal was inking during capture                                                       |
| A50*       | Adriatic      | 16                           | Male   | 28/04/2010       | 52.05          | 6.9                | 29.1                     | 22.1                         | 24.3                         | Animal was inking during capture                                                       |
| A51*       | Adriatic      | 16                           | Female | 29/04/2010       | 41.34          | 6.2                | 25.6                     | 13.6                         | 16.7                         | Animal was inking during capture                                                       |
| A61        | Adriatic      | 16                           | Male   | 12/07/2010       | 109.93         | 9.5                | 77.4                     | 42.1                         | 44.5                         | Animal was inking during capture                                                       |
| A62        | Adriatic      | 16                           | Male   | 13/07/2010       | 144.00         | 10.5               | 101.1                    | 56.3                         | 56.2                         |                                                                                        |
| A52*       | Adriatic      | 21                           | Female | 26/05/2010       | 148.82         | 10.5               | 74.7                     | 40.3                         | 43.8                         |                                                                                        |
| A53*       | Adriatic      | 21                           | Male   | 31/05/2010       | 128.71         | 10.0               | 68.7                     | 40.0                         | 39.8                         |                                                                                        |
| A54*       | Adriatic      | 21                           | Female | 2/06/2010        | 228.17         | 11.2               | 113.2                    | 65.3                         | 78.8                         | Female had proper developed gonads with yellowish transparent eggs                     |
| A55*       | Adriatic      | 21                           | Male   | 3/06/2010        | 252.92         | 12.7               | 135.6                    | 74.7                         | 74.3                         |                                                                                        |
| A56*       | Adriatic      | 21                           | Male   | 7/06/2010        | 149.30         | 10.4               | 75.7                     | 55.3                         | 47.6                         |                                                                                        |
| A57*       | Adriatic      | 21                           | Male   | 9/06/2010        | 150.37         | 10.1               | 75.6                     | 41.5                         | 45.3                         |                                                                                        |
| A58        | Adriatic      | 21                           | Female | 7/07/2010        | 147.75         | 10.0               | 86.7                     | 58.7                         | 56.9                         | Female had eggs                                                                        |
| A59        | Adriatic      | 21                           | Female | 8/07/2010        | 226.54         | 11.3               | 140.7                    | 82.9                         | 79.9                         | Animal was inking during capture, female had eggs                                      |
| A60        | Adriatic      | 21                           | Male   | 9/07/2010        | 198.63         | 11.6               | 109.0                    | 69.4                         | 74.8                         | Animal was inking during capture                                                       |
| A66        | Adriatic      | 21                           | Female | 21/07/2010       | 184.21         | 10.8               | 145.4                    | 87.7                         | 87.2                         | Female already mated as there were sucker marks on the head, had hardly ink in ink sac |
| A67        | Adriatic      | 21                           | Female | 23/07/2010       | 144.90         | 9.5                | 108.5                    | 57.4                         | 59.1                         | Female already mated as there were sucker marks on the head, had hardly ink in ink sac |
| A68        | Adriatic      | 21                           | Female | 26/07/2010       | 248.32         | 12.2               | 161.3                    | 96.0                         | 101.3                        |                                                                                        |
| A08        | Oosterschelde | 11                           | Male   | 10/07/2009       | 59.09          | 7.3                | 42.8                     | 23.9                         | 27.5                         |                                                                                        |
| A11        | Oosterschelde | 11                           | Male   | 15/07/2009       | 79.46          | 7.9                | 63.5                     | 41.2                         | 38.3                         |                                                                                        |
| A12        | Oosterschelde | 11                           | Female | 21/07/2009       | 89.19          | 8.3                | 63.2                     | 37.5                         | 39.1                         |                                                                                        |
| A23        | Oosterschelde | 11                           | Male   | 6/08/2009        | 96.64          | 8.9                | 81.2                     | 51.3                         | 48.5                         | Animal was inking during capture                                                       |
| A25        | Oosterschelde | 11                           | Male   | 12/08/2009       | 112.12         | 9.5                | 70.1                     | 47.0                         | 42.0                         |                                                                                        |
| A26        | Oosterschelde | 11                           | Male   | 13/08/2009       | 77.84          | 8.5                | 60.1                     | 37.0                         | 38.5                         |                                                                                        |
| A27        | Oosterschelde | 11                           | Male   | 18/08/2009       | 92.99          | 8.6                | 73.0                     | 43.4                         | 45.8                         | Animal was inking during capture                                                       |
| A28        | Oosterschelde | 11                           | Male   | 8/09/2009        | 79.98          | 8.1                | 65.1                     | 38.1                         | 36.0                         |                                                                                        |
| A29        | Oosterschelde | 11                           | Male   | 17/09/2009       | 83.31          | 8.7                | 83.6                     | 53.9                         | 50.6                         |                                                                                        |
| A04        | Oosterschelde | 16                           | Female | 4/06/2009        | 72.46          | 8.5                | –                        | –                            | –                            |                                                                                        |

|      |               |    |        |            |        |      |       |       |       |                                                                              |
|------|---------------|----|--------|------------|--------|------|-------|-------|-------|------------------------------------------------------------------------------|
| A05  | Oosterschelde | 16 | Female | 17/06/2009 | 84.50  | 8.6  | 57.3  | 31.6  | 31.4  | Animal was inking during capture                                             |
| A15  | Oosterschelde | 16 | Female | 22/07/2009 | 97.70  | 8.9  | 61.6  | 38.4  |       |                                                                              |
| A18  | Oosterschelde | 16 | Male   | 29/07/2009 | 108.29 | 9.1  | 111.4 | 46.4  | 43.8  | Animal was inking during capture                                             |
| A31  | Oosterschelde | 16 | Male   | 22/09/2009 | 125.10 | 9.3  | 114.5 | 50.4  | 59.3  |                                                                              |
| A32  | Oosterschelde | 16 | Male   | 23/09/2009 | 79.75  | 7.7  | 73.1  | 34.4  | 33.8  |                                                                              |
| A33  | Oosterschelde | 16 | Female | 24/09/2009 | 253.83 | 12.5 | 315.7 | 130.0 | 134.3 | Female had proper developed gonads with yellowish transparent and white eggs |
| A34* | Oosterschelde | 16 | Female | 28/08/2009 | 164.90 | 9.3  | 133.6 | 93.5  | 86.7  |                                                                              |
| A35  | Oosterschelde | 16 | Male   | 29/09/2009 | 155.89 | 10.2 | 131.5 | 65.4  | 68.0  | Animal was inking during capture                                             |
| A36  | Oosterschelde | 16 | Female | 30/09/2009 | 128.38 | 9.1  | 97.3  | 54.7  | 56.1  | Animal was inking during capture                                             |
| A37  | Oosterschelde | 16 | Female | 1/10/2009  | 165.94 | 10.3 | 183.0 | 90.1  | 87.0  |                                                                              |
| A38  | Oosterschelde | 16 | Male   | 5/10/2009  | 164.39 | 11.4 | 167.9 | 79.0  | 70.0  |                                                                              |
| A39* | Oosterschelde | 16 | Male   | 6/10/2009  | 278.93 | 12.6 | 214.8 | 127.8 | 133.0 |                                                                              |
| A40* | Oosterschelde | 16 | Male   | 7/10/2009  | 177.30 | 11.0 | 142.2 | 87.4  | 80.5  |                                                                              |
| A41* | Oosterschelde | 16 | Male   | 8/10/2009  | 178.59 | 10.5 | 123.9 | 80.8  | 89.8  | Animal was slightly inking during capture                                    |
| A42* | Oosterschelde | 16 | Female | 12/10/2009 | 225.04 | 10.9 | 183.3 | 108.6 | 116.9 |                                                                              |
| A43* | Oosterschelde | 16 | Male   | 13/10/2009 | 258.39 | 12.3 | 210.0 | 131.8 | 138.1 | Animal was slightly inking during capture                                    |
| A44* | Oosterschelde | 16 | Female | 14/10/2009 | 299.15 | 12.8 | 194.7 | 161.2 | 133.2 | Female had proper developed gonads with yellowish transparent eggs           |
| A45* | Oosterschelde | 16 | Female | 15/10/2009 | 276.24 | 12.3 | 184.6 | 146.7 | 155.6 | Female had proper developed gonads with yellowish transparent eggs           |
| A16  | Oosterschelde | 21 | Female | 27/07/2009 | 71.33  | 7.9  | 56.8  | 36.2  | 32.7  |                                                                              |
| A17  | Oosterschelde | 21 | Male   | 28/07/2009 | 83.59  | 8.1  | 77.7  | 41.4  | 39.5  | Heart muscle was relatively tough                                            |
| A20  | Oosterschelde | 21 | Female | 3/08/2009  | 102.13 | 8.5  | 75.5  | 45.7  | 44.5  |                                                                              |
| A21  | Oosterschelde | 21 | Male   | 4/08/2009  | 124.66 | 9.9  | 106.3 | 62.3  | 67.9  |                                                                              |
| A22  | Oosterschelde | 21 | Male   | 5/08/2009  | 123.77 | 8.9  | 110.7 | 65.3  | 60.4  |                                                                              |

Individuals marked with asterisks were used for morphometric statistics but not for measurement of mitochondrial respiration.
